# Supplementary material
Source: ML conference proceedings conference paper supplement (https://openreview.net/forum?id=Yvpenkym8A)
Supplement: supplementary_material [file attachment]

## 483 A Score Matching Estimator

484 We provide the proof of the score matching estimator for temporal point processes and spatial point  
 485 processes below, respectively. Generally speaking, the derivation for temporal point processes is more  
 486 complex than spatial point processes because as we can see later there exists some complications  
 487 arising from different limits of integration due to the order constraint on timestamps.

### 488 A.1 Temporal Point Processes

489 Given an observation window  $[0, T]$ , a sequence from a temporal point process is composed of a  
 490 random number of timestamps arranged in a sequential order  $S = \{t_n\}_{n=1}^N$  where  $t_1 < t_2 < \dots <$   
 491  $t_N$  and  $t_n \in [0, T]$  is the  $n$ -th event timestamp. We assume the ground-truth process generating the  
 492 data has a density  $p(S)$  and design a parameterized model with density  $p_\theta(S)$  where  $\theta$  is the model  
 493 parameter to estimate. Following Sahani et al. [25], we define a Fisher-divergence objective:

$$F(\theta) = \mathbb{E}_{p(S)} \frac{1}{2} \sum_{n=1}^N \left( \frac{\partial \log p(S)}{\partial t_n} - \frac{\partial \log p_\theta(S)}{\partial t_n} \right)^2. \quad (13)$$

494 The above loss can be understood as matching the variational derivatives of log-density w.r.t. the  
 495 counting process  $N(t)$  given that the counting process is non-decreasing and piece-wise constant  
 496 with unit steps.

497 However, the above loss cannot be minimized directly as it depends on the gradient of the ground-truth  
 498 data distribution which is unknown. Following the derivation of Hyvärinen [12], this dependence can  
 499 be eliminated by using a trick of integration by parts. Let us expand Eq. (13), discard  $\left(\frac{\partial \log p(S)}{\partial t_n}\right)^2$   
 500 which does not depend on parameter  $\theta$ , and examine the cross-term:

$$\begin{aligned} & \mathbb{E}_{p(S)} \left[ \frac{\partial \log p(S)}{\partial t_n} \frac{\partial \log p_\theta(S)}{\partial t_n} \right] \\ &= \int p(S) \frac{\partial \log p(S)}{\partial t_n} \frac{\partial \log p_\theta(S)}{\partial t_n} dS \\ &= \int_{S_{t_n^-}} \int_{t_n} \frac{\partial p(S)}{\partial t_n} \frac{\partial \log p_\theta(S)}{\partial t_n} dt_n dS_{t_n^-} \\ &= \int_{S_{t_n^-}} p(S) \frac{\partial \log p_\theta(S)}{\partial t_n} \Big|_{t_n=t_{n-1}}^{t_n=t_{n+1}} - \int_{t_n} p(S) \frac{\partial^2 \log p_\theta(S)}{\partial t_n^2} dt_n dS_{t_n^-} \\ &= \mathbb{E}_{p(S)} \left[ \frac{\partial \log p_\theta(S)}{\partial t_n} (\delta(t_n - t_{n+1}) - \delta(t_n - t_{n-1})) - \frac{\partial^2 \log p_\theta(S)}{\partial t_n^2} \right]. \end{aligned} \quad (14)$$

501 where  $S_{t_n^-}$  represents the sequence excluding  $t_n$ , the fourth line uses integration by parts, the fifth line  
 502 uses delta function to evaluate the limits of  $t_n$  given the order constraint of timestamps. Therefore,  
 503 the loss in Eq. (13) can be rewritten as:

$$\begin{aligned} F(\theta) &= \mathbb{E}_{p(S)} \left[ \sum_{n=1}^N \frac{1}{2} \left( \frac{\partial \log p_\theta(S)}{\partial t_n} \right)^2 \right. \\ &\quad \left. - \frac{\partial \log p_\theta(S)}{\partial t_n} (\delta(t_n - t_{n+1}) - \delta(t_n - t_{n-1})) + \frac{\partial^2 \log p_\theta(S)}{\partial t_n^2} \right] + C_1. \end{aligned} \quad (15)$$

504 where the constant  $C_1$  does not depend on  $\theta$  and can be discarded. To construct the final empirical  
 505 loss, we replace the expectation by the empirical average, which eliminates the delta functions as any  
 506 two timestamps cannot overlap with each other, and obtain the final version:

$$\hat{F}(\theta) = \frac{1}{M} \sum_{m=1}^M \sum_{n=1}^{N_m} \frac{1}{2} \left( \frac{\partial \log p_\theta(S_m)}{\partial t_{m,n}} \right)^2 + \frac{\partial^2 \log p_\theta(S_m)}{\partial t_{m,n}^2} + C_1, \quad (16)$$

507 where we take  $M$  sequences  $\{S_m\}_{m=1}^M$  from  $p(S)$ ,  $t_{m,n}$  is the  $n$ -th timestamp on the  $m$ -th sequence.

508 It is worth noting that Sahani et al. [25] assumed the parametric density satisfies the smoothness  
509 property:  $\partial_{t_n} \log p_\theta(S)|_{t_n=t_{n+1}} = \partial_{t_{n+1}} \log p_\theta(S)|_{t_{n+1}=t_n}$  to cancel most delta functions. Here, we  
510 emphasize that this smoothness assumption is not necessary. In our derivation, we do not utilize this  
511 smoothness property, but just take advantage of the non-overlapping of timestamps to eliminate all  
512 delta functions and obtain the same objective.

## 513 A.2 Spatial Point Processes

514 Let us consider a planar point process for example. Given a 2-D observation region  $\mathcal{X} \subseteq \mathcal{R}^2$ , a  
515 realization from a 2-D spatial point process is composed of a random number of points  $S = \{\mathbf{x}_n\}_{n=1}^N$ ,  
516 where  $\mathbf{x}_n \in \mathcal{X}$  is the  $n$ -th event location (2-D coordinate). It is worth noting that these points are in  
517 no order. Similarly, we define a Fisher-divergence objective:

$$F(\theta) = \mathbb{E}_{p(S)} \frac{1}{2} \sum_{n=1}^{2N} \left( \frac{\partial \log p(S)}{\partial x_n} - \frac{\partial \log p_\theta(S)}{\partial x_n} \right)^2, \quad (17)$$

518 where  $x_n$  is any entry in vector  $\mathbf{x}_n$ , i.e.,  $x_n \in \mathbf{x}_n$ .

519 Similarly, we use the trick of integration by parts to eliminate the dependence of the loss on the  
520 gradient of the unknown ground-truth data distribution. Let us expand Eq. (17), discard  $\left(\frac{\partial \log p(S)}{\partial x_n}\right)^2$   
521 which does not depend on parameter  $\theta$ , and examine the cross-term:

$$\begin{aligned} & \mathbb{E}_{p(S)} \left[ \frac{\partial \log p(S)}{\partial x_n} \frac{\partial \log p_\theta(S)}{\partial x_n} \right] \\ &= \int p(S) \frac{\partial \log p(S)}{\partial x_n} \frac{\partial \log p_\theta(S)}{\partial x_n} dS \\ &= \int_{S_{x_n^-}} \int_{x_n} \frac{\partial p(S)}{\partial x_n} \frac{\partial \log p_\theta(S)}{\partial x_n} dx_n dS_{x_n^-} \\ &= \int_{S_{x_n^-}} p(S) \frac{\partial \log p_\theta(S)}{\partial x_n} \Big|_{x_n=-\infty}^{x_n=+\infty} - \int_{x_n} p(S) \frac{\partial^2 \log p_\theta(S)}{\partial x_n^2} dx_n dS_{x_n^-} \\ &= \mathbb{E}_{p(S)} \left[ -\frac{\partial^2 \log p_\theta(S)}{\partial x_n^2} \right]. \end{aligned} \quad (18)$$

522 where  $S_{x_n^-}$  represents the realization excluding  $x_n$ , the fourth line uses integration by parts, the fifth  
523 line assumes a weak regularity condition:  $p(S) \partial_{x_n} \log p_\theta(S)$  goes to zero for any  $\theta$  when  $|x_n| \rightarrow \infty$ .  
524 It is worth noting that in spatial point processes the limits of  $x_n$  are no longer constrained because  
525 there is no order for the points. Therefore, the loss in Eq. (17) can be rewritten as:

$$F(\theta) = \mathbb{E}_{p(S)} \left[ \sum_{n=1}^{2N} \frac{1}{2} \left( \frac{\partial \log p_\theta(S)}{\partial x_n} \right)^2 + \frac{\partial^2 \log p_\theta(S)}{\partial x_n^2} \right] + C_1. \quad (19)$$

526 where the constant  $C_1$  does not depend on  $\theta$  and can be discarded. Replacing the expectation by the  
527 empirical average, we obtain the final empirical loss:

$$\hat{F}(\theta) = \frac{1}{M} \sum_{m=1}^M \sum_{n=1}^{2N_m} \frac{1}{2} \left( \frac{\partial \log p_\theta(S_m)}{\partial x_{m,n}} \right)^2 + \frac{\partial^2 \log p_\theta(S_m)}{\partial x_{m,n}^2} + C_1, \quad (20)$$

528 where we take  $M$  realizations  $\{S_m\}_{m=1}^M$  from  $p(S)$ ,  $x_{m,n}$  is the  $n$ -th variable on the  $m$ -th realization.

## 529 A.3 Spatio-temporal Point Processes

530 It is interesting to see that both score matching estimators for temporal point processes and spatial  
531 point processes have the same empirical loss (see Eq. (16) and Eq. (20)) regardless of whether the  
532 points are sequential or not. Therefore, it is easy to draw the conclusion that for spatio-temporal point  
533 processes the empirical score matching estimator is:

$$\hat{F}(\theta) = \frac{1}{M} \sum_{m=1}^M \sum_{n=1}^{\tilde{N}_m} \frac{1}{2} \left( \frac{\partial \log p_\theta(S_m)}{\partial s_{m,n}} \right)^2 + \frac{\partial^2 \log p_\theta(S_m)}{\partial s_{m,n}^2} + C_1, \quad (21)$$

534 where  $s_{m,n}$  is the  $n$ -th variable on the  $m$ -th sequence,  $\tilde{N}_m$  is the number of equivalent variables on the  
535  $m$ -th sequence,  $\tilde{N}_m = N_m$  for 1-D point process, e.g., temporal point process;  $\tilde{N}_m = 2N_m$  for 2-D  
536 point process, e.g., spatial point process; and  $\tilde{N}_m = 3N_m$  for 3-D point process, e.g., spatio-temporal  
537 point process, etc.

## 538 B Denoising Score Matching Estimator

539 In Appendix A, we provide an estimator trying to match the gradient of the log-density of the point  
540 process model to the log-density of the point process data. However, the estimator requires the second  
541 derivatives, which is computationally expensive. To avoid this issue, following the derivation of  
542 Vincent [31], we derive a denoising score matching estimator.

543 Differently, the denoising score matching estimator tries to match the gradient of the log-density of  
544 the model to the log-density of the noisy point process data. We add a small noise to the sequence  
545  $S$  to obtain a noisy sequence  $\tilde{S}$  (we add noise to each variable  $\tilde{s}_n = s_n + \epsilon$ ), which is distributed  
546 as  $p(\tilde{S}) = \int p(\tilde{S} | S)p(S)dS$ . Therefore, the Fisher divergence between the noisy data distribution  
547  $p(\tilde{S})$  and model distribution  $p_\theta(\tilde{S})$  is:

$$F_{\text{DSM}}(\theta) = \mathbb{E}_{p(\tilde{S})} \frac{1}{2} \sum_{n=1}^{\tilde{N}} \left( \frac{\partial \log p(\tilde{S})}{\partial \tilde{s}_n} - \frac{\partial \log p_\theta(\tilde{S})}{\partial \tilde{s}_n} \right)^2, \quad (22)$$

548 where  $\tilde{s}_n$  is any entry in the noisy vector  $\tilde{\mathbf{s}}_n$ , i.e.,  $\tilde{s}_n \in \tilde{\mathbf{s}}_n = (\tilde{t}_n, \tilde{\mathbf{x}}_n)$ ,  $\tilde{N}$  is the number of equivalent  
549 variables. Let us expand Eq. (22), discard  $(\frac{\partial \log p(\tilde{S})}{\partial \tilde{s}_n})^2$  which does not depend on parameter  $\theta$ , and  
550 examine the cross-term:

$$\begin{aligned} & \mathbb{E}_{p(\tilde{S})} \left[ \frac{\partial \log p(\tilde{S})}{\partial \tilde{s}_n} \frac{\partial \log p_\theta(\tilde{S})}{\partial \tilde{s}_n} \right] \\ &= \int p(\tilde{S}) \frac{\partial \log p(\tilde{S})}{\partial \tilde{s}_n} \frac{\partial \log p_\theta(\tilde{S})}{\partial \tilde{s}_n} d\tilde{S} \\ &= \int \frac{\partial}{\partial \tilde{s}_n} \int p(\tilde{S} | S)p(S)dS \frac{\partial \log p_\theta(\tilde{S})}{\partial \tilde{s}_n} d\tilde{S} \\ &= \iint p(S) \frac{\partial p(\tilde{S} | S)}{\partial \tilde{s}_n} \frac{\partial \log p_\theta(\tilde{S})}{\partial \tilde{s}_n} dS d\tilde{S} \\ &= \iint p(S)p(\tilde{S} | S) \frac{\partial \log p(\tilde{S} | S)}{\partial \tilde{s}_n} \frac{\partial \log p_\theta(\tilde{S})}{\partial \tilde{s}_n} dS d\tilde{S} \\ &= \mathbb{E}_{p(S, \tilde{S})} \left[ \frac{\partial \log p(\tilde{S} | S)}{\partial \tilde{s}_n} \frac{\partial \log p_\theta(\tilde{S})}{\partial \tilde{s}_n} \right]. \end{aligned} \quad (23)$$

551 Therefore, the loss in Eq. (22) can be rewritten as:

$$\begin{aligned} & F_{\text{DSM}}(\theta) \\ &= \sum_{n=1}^{\tilde{N}} \mathbb{E}_{p(\tilde{S})} \frac{1}{2} \left( \frac{\partial \log p_\theta(\tilde{S})}{\partial \tilde{s}_n} \right)^2 - \mathbb{E}_{p(S, \tilde{S})} \left[ \frac{\partial \log p(\tilde{S} | S)}{\partial \tilde{s}_n} \frac{\partial \log p_\theta(\tilde{S})}{\partial \tilde{s}_n} \right] + C \\ &= \mathbb{E}_{p(S, \tilde{S})} \sum_{n=1}^{\tilde{N}} \frac{1}{2} \left( \frac{\partial \log p_\theta(\tilde{S})}{\partial \tilde{s}_n} \right)^2 - \frac{\partial \log p(\tilde{S} | S)}{\partial \tilde{s}_n} \frac{\partial \log p_\theta(\tilde{S})}{\partial \tilde{s}_n} + C \\ &= \mathbb{E}_{p(S, \tilde{S})} \frac{1}{2} \sum_{n=1}^{\tilde{N}} \left( \frac{\partial \log p(\tilde{S} | S)}{\partial \tilde{s}_n} - \frac{\partial \log p_\theta(\tilde{S})}{\partial \tilde{s}_n} \right)^2 + C_2, \end{aligned} \quad (24)$$

552 where the constants  $C$  and  $C_2$  do not depend on  $\theta$  and can be discarded. Replacing the expectation  
553 by the empirical average, we obtain the final empirical loss:

$$\hat{F}_{\text{DSM}}(\theta) = \frac{1}{2M} \sum_{m=1}^M \sum_{n=1}^{\tilde{N}_m} \left( \frac{\partial \log p(\tilde{S}_m | S_m)}{\partial \tilde{s}_{m,n}} - \frac{\partial \log p_\theta(\tilde{S}_m)}{\partial \tilde{s}_{m,n}} \right)^2 + C_2, \quad (25)$$

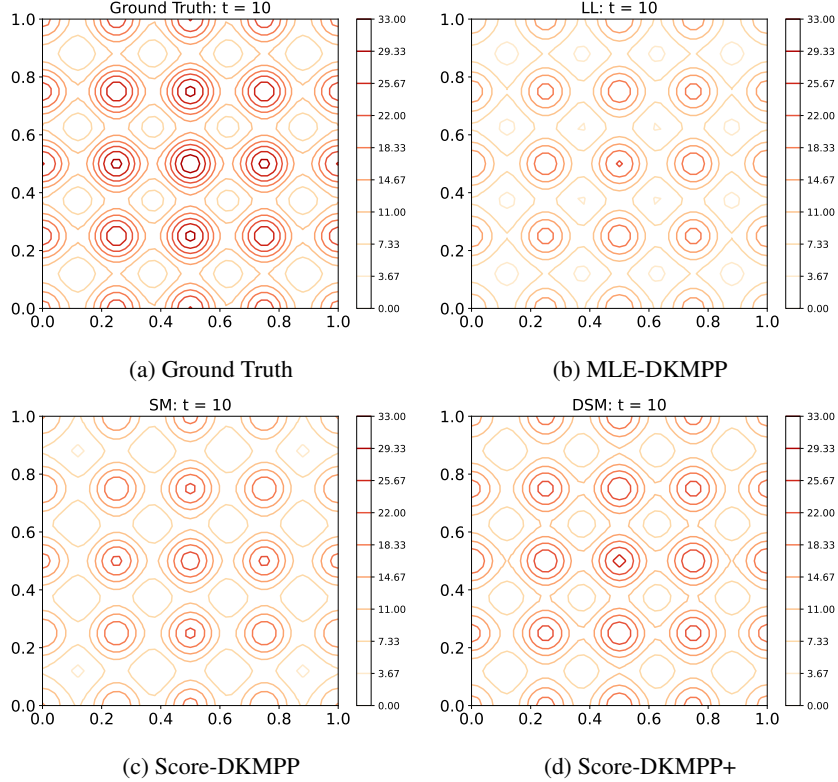

Figure 2: The intensity function at  $t = 10$  estimated by three estimators (MLE-DKMPP, Score-DKMPP, Score-DKMPP+) with 1,000 Monte Carlo (MC) samples. Three estimators exhibit similar performance. Score-DKMPP and Score-DKMPP+ do not require Monte Carlo integration, and thus their estimation remain consistent regardless of MC samples. In contrast, MLE-DKMPP heavily relies on MC sampling and therefore its performance depends on the number of MC samples.

554 where we take  $M$  clean and noisy sequences  $\{S_m, \tilde{S}_m\}_{m=1}^M$  from  $p(S, \tilde{S})$ ,  $\tilde{s}_{m,n}$  is the  $n$ -th variable  
 555 on the  $m$ -th noisy sequence,  $\tilde{N}_m$  is the number of equivalent variables on the  $m$ -th noisy sequence.

## 556 C Experimental Details

### 557 C.1 Synthetic Data

558 **Data Simulation** We generate a 3-D spatio-temporal point process synthetic dataset. The spatial  
 559 observation  $\mathbf{x}$  spans the area of  $[0, 1] \times [0, 1]$ , while the temporal observation window covers the  
 560 time interval of  $[0, 10]$ . We assume a 1-D covariate function  $Z(\mathbf{u} = (\tau, \mathbf{r})) = (\mathcal{N}(r_1 | 0.5, 0.5) +$   
 561  $\mathcal{N}(r_2 | 0.5, 0.5))$  on the domain. We set  $f_{w_1}(\mathbf{u}_j, Z(\mathbf{u}_j)) = 20Z(\mathbf{u}_j) + 0.1$ ,  $k_{\phi, w_2}(\mathbf{s}, \mathbf{u}_j) =$   
 562  $k_{\phi}(g_{w_2}(\mathbf{s}), g_{w_2}(\mathbf{u}_j))$  where  $k_{\phi}$  is the RBF kernel  $k_{\phi}(\mathbf{x}, \mathbf{x}') = \exp(-\phi\|\mathbf{x} - \mathbf{x}'\|^2)$  with  $\phi = 100$   
 563 and  $g_{w_2}$  is a linear transformation  $g_{w_2}(\mathbf{s}) = \mathbf{s} + 0.1$ . We fix the representative points on a regular grid:  
 564 5 representative points evenly spaced on each axis, so there are  $5^3 = 125$  representative points in  
 565 total. We use the thinning algorithm to generate 5,000 sequences according to the intensity function  
 566 specified above. The statistics of the synthetic data are shown in Table 3.

567 **Training Details** We fit a DKMPP model to the synthetic data with the ground-truth representative  
 568 points and an RBF base kernel. Both the kernel mixture weight network  $f$  and the non-linear  
 569 transformation  $g$  in the deep kernel are implemented using MLPs with ReLU activation functions.  
 570 Therefore, the learnable parameters are  $w_1, w_2, \phi$ . The intensity functions at  $t = 10$  estimated by  
 571 three different estimators are shown in Fig. 2.

Table 3: The statistics of synthetic and real-world datasets.

| Dataset                | Covariate Dimension | # of sequences | average # of events per sequence |
|------------------------|---------------------|----------------|----------------------------------|
| Synthetic              | 1                   | 5,000          | 17                               |
| Crimes in Vancouver    | 1                   | 1,096          | 87                               |
| NYC Vehicle Collisions | 768                 | 61             | 327                              |
| NYC Complaint Data     | 768                 | 301            | 63                               |

## 572 C.2 Real-world Data

573 **Data Preprocessing** The preprocessing details of three real-world datasets are shown below. We  
574 listed the statistics of three real-world datasets after preprocessing in Table 3.

575 *Crimes in Vancouver* This dataset is composed of more than 530 thousand crime records, including  
576 all categories of crimes committed in Vancouver from 2003 to 2017. Each crime record contains the  
577 time and location (latitude and longitude) of the crime. We split the data into multiple sequences by  
578 year, month and day. Then, we select events from 2013 to 2016, drop the NaN value, and scale the  
579 time and space into a volume of  $[0, 1] \times [0, 1] \times [0, 10]$ . We select the categorical feature ‘Crime Type’  
580 as the descriptive feature for each event. We convert the categorical feature into the corresponding  
581 numerical feature as the covariate. Finally, the dimension of covariate  $\mathbf{Z}$  is 1.

582 *NYC Vehicle Collisions* The New York City vehicle collision dataset contains about 1.05 million  
583 vehicle collision records. Each collision record includes the time and location (latitude and longitude).  
584 We split the data into multiple sequences by day. We select the records from 01/01/2019 to 02/03/2019,  
585 drop the NaN value and scale the time and space into a volume of  $[0, 1] \times [0, 1] \times [0, 10]$ . We select  
586 ‘BOROUGH’, ‘CONTRIBUTING FACTOR VEHICLE 1’, ‘CONTRIBUTING FACTOR VEHICLE  
587 2’ and ‘VEHICLE TYPE CODE 1’ as the descriptive features for each event. We concatenate several  
588 textual features and use a pre-trained DistilBERT [26] to extract the textual features, and concatenate  
589 the textual features with other numerical/categorical features as the covariate. Finally, the dimension  
590 of covariate  $\mathbf{Z}$  is 768.

591 *NYC Complaint Data* This dataset contains over 228 thousand complaint records in New York City.  
592 Each record includes the date, time, and location (latitude and longitude) of the complaint. We split  
593 the data into multiple sequences by hour. We select the records from 01/11/2022 to 13/11/2022,  
594 drop the NaN value and scale the time and space into a volume of  $[0, 1] \times [0, 1] \times [0, 10]$ . We select  
595 ‘OFNS\_DESC’, ‘JURIS\_DESC’, ‘LAW\_CAT\_CD’, ‘PD\_DESC’, ‘VIC\_RACE’, ‘VIC\_SEX’ and  
596 ‘PREM\_TYP\_DESC’ as the descriptive features for each event. We concatenate several textual  
597 features and use a pre-trained DistilBERT [26] to extract the textual features, and concatenate the  
598 textual features with other numerical/categorical features as the covariate. Finally, the dimension of  
599 covariate  $\mathbf{Z}$  is 768.

600 **Training Details** Each dataset is divided into training, validation and test data using a  
601 50%/40%/10% split ratio based on time. For the real-world data, we fix the representative points  
602 on a regular grid: 5 representative points evenly spaced on each axis, so there are  $5^3 = 125$  repre-  
603 sentative points in total. We use three different kernel functions for comparisons: the RBF kernel  
604  $k_\phi(\mathbf{x}, \mathbf{x}') = \exp(-\phi\|\mathbf{x} - \mathbf{x}'\|^2)$ , the rational quadratic (RQ) kernel  $k_\phi(\mathbf{x}, \mathbf{x}') = (1 + \phi\|\mathbf{x} - \mathbf{x}'\|^2)^{-\frac{1}{2}}$ ,  
605 and the Ornstein-Uhlenbeck (OU) kernel  $k_\phi(\mathbf{x}, \mathbf{x}') = \exp(-\phi\|\mathbf{x} - \mathbf{x}'\|)$ . For the three real-world  
606 datasets, the kernel mixture weight network  $f$  and the non-linear transformation  $g$  in the deep kernel  
607 are implemented using MLPs with ReLU activation functions and we fixed the number of layers in  $f$   
608 and  $g$  as 2.

609 **Hyperparameters** We tested the performance of Score-DKMPP and Score-DKMPP+ with different  
610 hyperparameters on three real-world datasets. We tested the number of representation points and  
611 network structures. For the representation points, we tested three different values, 64, 125, and 216,  
612 respectively. For the network structure, we tested the number of layers of 1, 2, and 4. When we tested  
613 the effect of representation points, we fix the network with 2 hidden layers and when we tested the  
614 effect of network structure, we fix the number of representation points as 125.

615 For the representation points, the accuracy of Score-DKMPP and Score-DKMPP+ overall have better  
616 performance when the number of representation points is 125. The accuracy tends to increase when

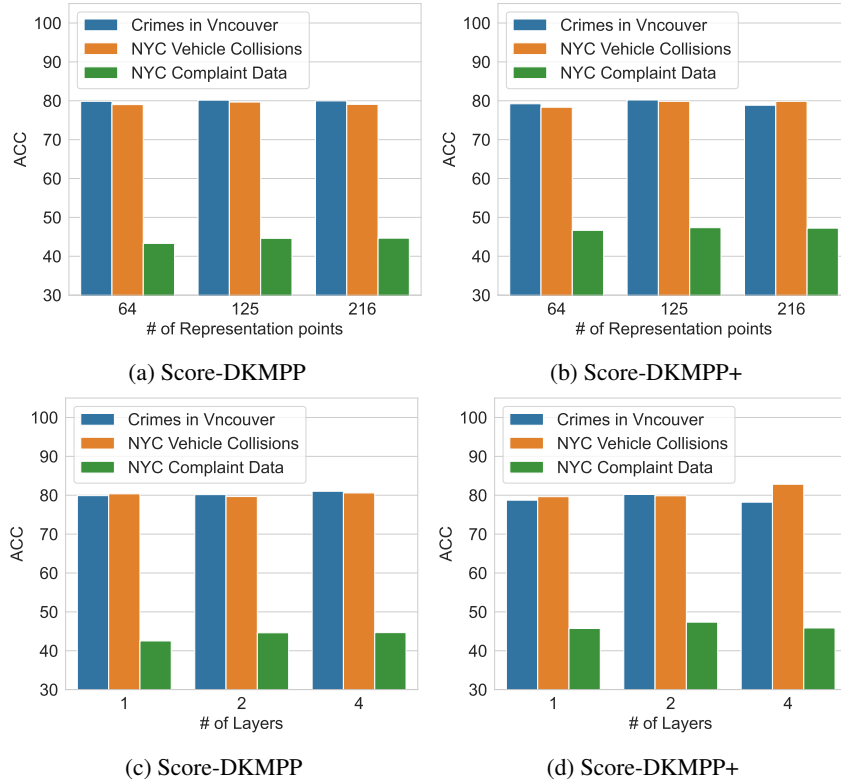

Figure 3: (a) The ACC performance of Score-DKMPP with the number of representation points of 64, 125 and 216; (b) the ACC performance of Score-DKMPP+ with the number of representation points of 64, 125 and 216; (c) the ACC performance of Score-DKMPP with the number of layers of 1, 2 and 4; (d) the ACC performance of Score-DKMPP+ with the number of layers of 1, 2 and 4.

617 the number of representation points increases from 64 to 125, however, except for the performance of  
 618 Score-DKMPP on the complaint dataset, for other real-world datasets, the accuracy starts to drop.

619 For the network structure, the accuracy using Score-DKMPP on the Crimes in Vancouver and NYC  
 620 Complaint data tends to increase as the number of layers increases. However, for Score-DKMPP+,  
 621 we only capture a similar trend on the NYC Vehicle Collisions data. Other than those mentioned  
 622 above, we do not observe a significant pattern when increasing the number of layers.
